# Supplementary material
Source: HighWire-hosted journal article supplement (https://bjgp.org/highwire/filestream/27648/field_highwire_adjunct_files/3/bjpg57-866BoxS4.pdf)
Supplement: bjpg57-866BoxS4.pdf [file bjpg57-866BoxS4.pdf]

**Supplementary Box 4. Excerpt of a consultation to illustrate how a child may talk in terms of the child's world.**

► d. right (.) ok (.) ((computer noise)) (1.3) what can I ↑ do:: for::yu ? *Doctor looks at child, child doesn't answer, child looks at mother, child looks back at doctor and shrugs shoulders* (6.0).

► m. ((laughs)) basically'h he has he had grommets put in (.) that would be 2 years ago in ....

Lines of transcription omitted. The child and doctor interact, the child answering the doctor's questions

► c. it hurt in art about half past two

► d. ri::ght (.) so that was this afternoon really that it started getting bad (.) right and which ea::r are we talking about ? (.)

► c. (2.0) year 4

► d. NO no which EA:R sorry

► c. (1.5) oh

► d. CAUSE YOU'RE A BIT DEAF aren't you are you feeling a bit deaf (.)

► c. (1.0) no::::. I think it has been in both ears but especially in my right ear

The doctor here does talk with the child. Note the long pause of six seconds that is given to allow the child to make a response to an initial greeting. The doctor engages in talk with the child but when the child says year instead of ear the doctor stops talking with the child and goes on to have the discussion with the child's mother.
